# Supplementary material for: Encapsulation of α-tocopherol acetate of emulsion gels by synergistic stabilization with polysaccharides and modified shea butter
Source: Royal Society of Chemistry journal article supplement (doi:10.1039/d3nj01306e), 2023-01-01
Supplement: d3nj01306e1.pdf [file d3nj01306e1.pdf]

# Pickering emulsion gels synergistically stabilized by polysaccharides and modified shea butter for $\alpha$ -tocopherol Acetate Encapsulation and Delivery

Yanan Han<sup>1</sup>, Xiumei Tai<sup>1\*</sup>, Tao Geng<sup>1</sup>, Huimin Liu<sup>1</sup>, XiaoYi Yang<sup>1</sup>

<sup>1</sup> China Research Institute of Daily Chemistry Co., Ltd., Wenyuan Alley No.34, Taiyuan, Shanxi 030001, P. R. China

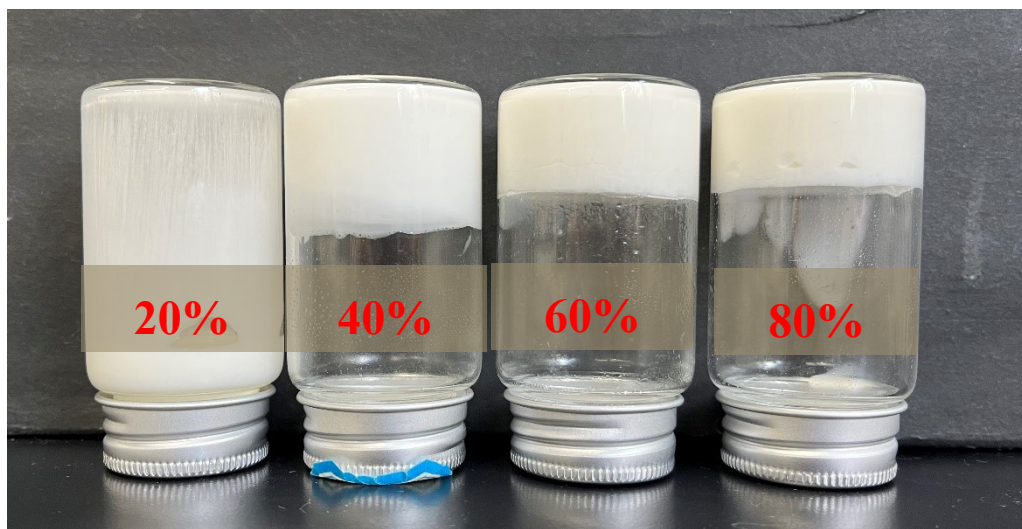

**Fig S1.** Appearance of samples with the oil phase fractions of (A)20vol%, (B) 40vol%, (C) 60vol% and (D) 80vol% stabilized by SB-50 and GG.

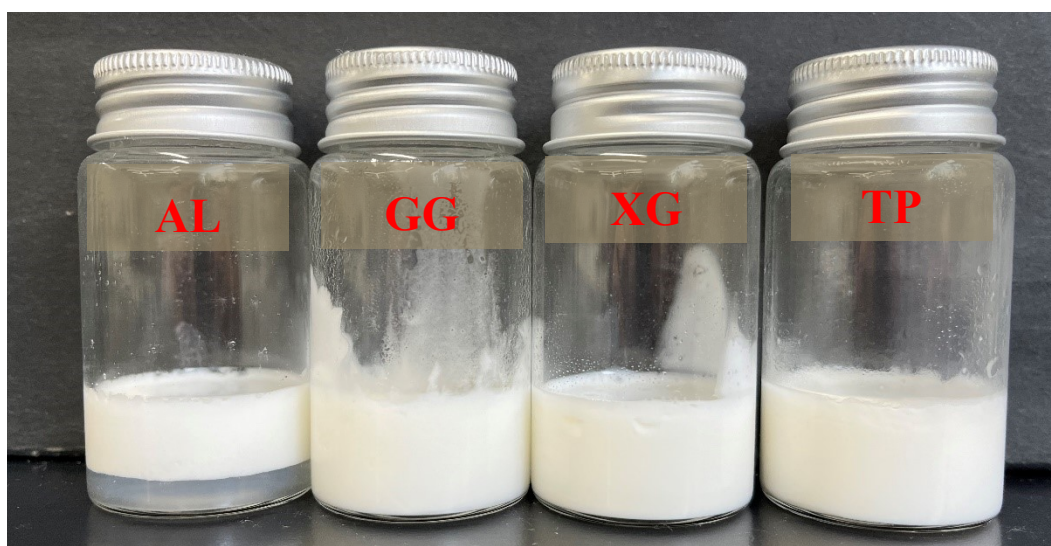

**Fig S2.** Photographs of emulsion gels after 30 days prepared with different polysaccharide particles.
